# Supplementary material for: Nonalcoholic Fatty Liver Disease Is a Precursor of New-Onset Metabolic Syndrome in Metabolically Healthy Young Adults
Source: MDPI journal article supplement (doi:10.3390/jcm11040935), 2022-02-11
Supplement: s1 [file s1]

**Supplementary Table S1. Risk of metabolic components according to fatty liver index**

| Outcome                  |        | FLI     | Number  | Duration      | Events, n | Crude                                        | Model 1*     |                  | Model 2†     |                  | Model 3§     |   |
|--------------------------|--------|---------|---------|---------------|-----------|----------------------------------------------|--------------|------------------|--------------|------------------|--------------|---|
|                          |        |         |         | (person-year) |           | incidence<br><br>rate (per<br><br>1,000 p-y) | IRR (95% CI) | P                | IRR (95% CI) | P                | IRR (95% CI) | P |
| Low HDL cholesterol      | <30    | 1585018 | 5927150 | 254558        | 42.95     | 1(Ref.)                                      | <.0001       | 1(Ref.)          | <.0001       | 1(Ref.)          | <.0001       |   |
|                          | 30-<60 | 71642   | 254518  | 16813         | 66.06     | 1.53 (1.51-1.56)                             |              | 1.75 (1.73-1.78) |              | 1.34 (1.31-1.36) |              |   |
|                          | ≥60    | 2532    | 8703    | 571           | 65.61     | 1.52 (1.40-1.65)                             |              | 1.73 (1.60-1.88) |              | 1.18 (1.09-1.28) |              |   |
| High triglyceride        | <30    | 1585018 | 5677746 | 331836        | 58.45     | 1(Ref.)                                      | <.0001       | 1(Ref.)          | <.0001       | 1(Ref.)          | <.0001       |   |
|                          | 30-<60 | 71642   | 166404  | 42647         | 256.29    | 4.38 (4.34-4.42)                             |              | 2.64 (2.61-2.67) |              | 2.31 (2.28-2.34) |              |   |
|                          | ≥60    | 2532    | 4680    | 1743          | 372.45    | 6.37 (6.07-6.67)                             |              | 3.81 (3.64-4.00) |              | 3.15 (3.00-3.31) |              |   |
| Elevated fasting glucose | <30    | 1585018 | 5533261 | 399765        | 72.25     | 1(Ref.)                                      | <.0001       | 1(Ref.)          | <.0001       | 1(Ref.)          | <.0001       |   |
|                          | 30-<60 | 71642   | 214766  | 30574         | 142.36    | 1.97 (1.94-1.99)                             |              | 1.38 (1.36-1.39) |              | 1.21 (1.20-1.23) |              |   |
|                          | ≥60    | 2532    | 6747    | 1222          | 181.11    | 2.50 (2.36-2.65)                             |              | 1.74 (1.64-1.84) |              | 1.44 (1.36-1.53) |              |   |
|                          | <30    | 1585018 | 5383924 | 403287        | 74.91     | 1(Ref.)                                      | <.0001       | 1(Ref.)          | <.0001       | 1(Ref.)          | <.0001       |   |
|                          | 30-<60 | 71642   | 177182  | 39258         | 221.57    | 2.95 (2.92-2.98)                             |              | 1.63 (1.62-1.65) |              | 1.23 (1.22-1.25) |              |   |

|                                |        |         |         |        |        |                     |        |                   |        |                  |
|--------------------------------|--------|---------|---------|--------|--------|---------------------|--------|-------------------|--------|------------------|
| <b>Elevated blood pressure</b> | ≥60    | 2532    | 5259    |        | 300.41 | 4.01 (3.81-4.21)    |        | 2.20 (2.09-2.31)  |        | 1.47 (1.40-1.54) |
|                                |        |         |         | 1580   |        |                     |        |                   |        |                  |
| <b>Abdominal obesity</b>       | <30    | 1585018 | 6232612 | 160577 | 25.76  | 1(Ref.)             | <.0001 | 1(Ref.)           | <.0001 | 1(Ref.)          |
|                                | 30-<60 | 71642   | 203974  | 31717  | 155.50 | 6.03 (5.96-6.10)    |        | 5.21 (5.14-5.28)  |        | 1.71 (1.69-1.74) |
|                                | ≥60    | 2532    | 5388    | 1551   | 287.86 | 11.17 (10.62-11.74) |        | 9.71 (9.24-10.21) |        | 2.27 (2.16-2.39) |

Abbreviations: p-y, person-year; IRR, incidence rate ratio; HDL, high density lipoprotein; LDL, low density lipoprotein; CI, confidence interval;

FLI, fatty liver index.

\* Model 1: unadjusted model

† Model 2: adjusted for age, sex

§ Model 3: adjusted for age, sex, alcohol drink, smoking, regular exercise, body mass index

**Supplementary Table S2. Relationship between fatty liver index and risk of metabolic syndrome stratified by baseline characteristics**

| Subgroup | FLI    | Number | Duration<br>(person-year) | Events | Crude incidence<br>rate (per 1,000 p-y) | Multivariable Model* |         |                   |
|----------|--------|--------|---------------------------|--------|-----------------------------------------|----------------------|---------|-------------------|
|          |        |        |                           |        |                                         | IRR (95% CI)         | P-value | P for interaction |
| Age      |        |        |                           |        |                                         | <0.001               |         |                   |
|          | <30    | 880059 | 3890818                   | 48836  | 12.55                                   | 1 (reference)        | <0.001  |                   |
| <30      | 30-<60 | 24361  | 93383                     | 9363   | 100.26                                  | 2.05 (1.99-2.10)     |         |                   |
|          | ≥60    | 769    | 2493                      | 405    | 162.47                                  | 2.62 (2.37-2.89)     |         |                   |
|          | <30    | 704959 | 2559504                   | 37170  | 14.52                                   | 1 (reference)        | <0.001  |                   |
| ≥30      | 30-<60 | 47281  | 148700                    | 12753  | 85.76                                   | 2.24 (2.19-2.30)     |         |                   |
|          | ≥60    | 1763   | 4563                      | 712    | 156.02                                  | 3.27 (3.03-3.53)     |         |                   |
| Sex      |        |        |                           |        |                                         | <0.001               |         |                   |
|          | <30    | 686261 | 2903037                   | 67403  | 23.22                                   | 1 (reference)        | <0.001  |                   |
| Male     | 30-<60 | 68680  | 233230                    | 21364  | 91.60                                   | 2.34 (2.30-2.39)     |         |                   |
|          | ≥60    | 2452   | 6812                      | 1093   | 160.46                                  | 3.36 (3.16-3.57)     |         |                   |
| Female   | <30    | 898757 | 3547286                   | 18603  | 5.24                                    | 1 (reference)        | <0.001  |                   |

|                     |            |         |         |       |        |                  |        |
|---------------------|------------|---------|---------|-------|--------|------------------|--------|
| Alcohol consumption | 30-<60     | 2962    | 8853    | 752   | 84.95  | 2.83 (2.62-3.06) | <0.001 |
|                     | ≥60        | 80      | 244     | 24    | 98.20  | 3.09 (2.07-4.62) |        |
|                     | <30        | 705868  | 2780924 | 28721 | 10.33  | 1 (reference)    |        |
|                     | None       | 30-<60  | 17595   | 56029 | 5223   | 93.22            |        |
|                     | ≥60        | 520     | 1374    | 210   | 152.83 | 2.81 (2.44-3.22) |        |
|                     | <30        | 879150  | 3669399 | 57285 | 15.61  | 1 (reference)    |        |
| Mild-to-moderate    | 30-<60     | 54047   | 186054  | 16893 | 90.80  | 2.18 (2.14-2.23) | <0.001 |
|                     | ≥60        | 2012    | 5682    | 907   | 159.62 | 3.04 (2.84-3.25) |        |
|                     | <30        | 1103436 | 4465478 | 38829 | 8.70   | 1 (reference)    |        |
|                     | Non-smoker | 30-<60  | 23765   | 81433 | 6740   | 82.77            |        |
|                     | ≥60        | 749     | 2172    | 308   | 141.79 | 2.79 (2.49-3.12) |        |
|                     | <30        | 120225  | 499109  | 8933  | 17.90  | 1 (reference)    |        |
| Ex-smoker           | 30-<60     | 10752   | 36478   | 2900  | 79.50  | 2.37 (2.25-2.49) | <0.001 |
|                     | ≥60        | 374     | 1065    | 130   | 122.12 | 3.08 (2.58-3.68) |        |

|                                    |        |         |         |       |        |                  |        |        |
|------------------------------------|--------|---------|---------|-------|--------|------------------|--------|--------|
|                                    | <30    | 361357  | 1485736 | 38244 | 25.74  | 1 (reference)    | <0.001 |        |
| Current smoker                     | 30-<60 | 37125   | 124171  | 12476 | 100.47 | 2.27 (2.21-2.32) |        |        |
|                                    | ≥60    | 1409    | 3819    | 679   | 177.78 | 3.27 (3.02-3.53) |        |        |
| Regular exercise                   |        |         |         |       |        |                  |        | 0.001  |
|                                    | <30    | 1396515 | 5685919 | 72215 | 12.70  | 1 (reference)    | <0.001 |        |
| No                                 | 30-<60 | 61430   | 208430  | 18705 | 89.74  | 2.13 (2.08-2.17) |        |        |
|                                    | ≥60    | 2180    | 6184    | 951   | 153.78 | 2.85 (2.67-3.05) |        |        |
|                                    | <30    | 188503  | 764404  | 13791 | 18.04  | 1 (reference)    | <0.001 |        |
| Yes                                | 30-<60 | 10212   | 33653   | 3411  | 101.36 | 2.06 (1.97-2.16) |        |        |
|                                    | ≥60    | 352     | 872     | 166   | 190.35 | 3.23 (2.77-3.78) |        |        |
| Body mass index, kg/m <sup>2</sup> |        |         |         |       |        |                  |        | <0.001 |
|                                    | <30    | 1489266 | 6090333 | 68329 | 11.22  | 1 (reference)    | <0.001 |        |
| <25                                | 30-<60 | 26117   | 92641   | 6167  | 66.57  | 3.22 (3.14-3.31) |        |        |
|                                    | ≥60    | 251     | 782     | 71    | 90.81  | 4.41 (3.50-5.57) |        |        |
|                                    | <30    | 95752   | 359990  | 17677 | 49.10  | 1 (reference)    | <0.001 |        |
| ≥25                                | 30-<60 | 45525   | 149442  | 15949 | 106.72 | 1.93 (1.89-1.98) |        |        |

|              |     |        |         |         |       |        |                  |        |
|--------------|-----|--------|---------|---------|-------|--------|------------------|--------|
| Dyslipidemia |     | ≥60    | 2281    | 6274    | 1046  | 166.71 | 2.99 (2.81-3.19) | <0.001 |
|              |     | <30    | 1550326 | 6320076 | 82585 | 13.07  | 1 (reference)    |        |
|              | No  | 30-<60 | 65821   | 223929  | 20127 | 89.88  | 2.09 (2.05-2.13) |        |
|              |     | ≥60    | 2194    | 6179    | 955   | 154.57 | 2.85 (2.67-3.05) |        |
|              |     | <30    | 34692   | 130247  | 3421  | 26.27  | 1 (reference)    |        |
|              | Yes | 30-<60 | 5821    | 18154   | 1989  | 109.56 | 1.79 (1.67-1.92) |        |
|              |     | ≥60    | 338     | 878     | 162   | 184.57 | 2.50 (2.12-2.96) |        |

---

Abbreviations: p-y, person-year; IRR, incidence rate ratio; CI, confidence interval; FLI, fatty liver index.

\*Adjusted for age, sex, alcohol consumption, smoking, regular exercise, and body mass index.

The dot represents the incidence rate ratio, and the vertical line represents corresponding 95% confidence interval. The graph was adjusted for age, sex, alcohol consumption, smoking status, regular exercise, and body mass index.

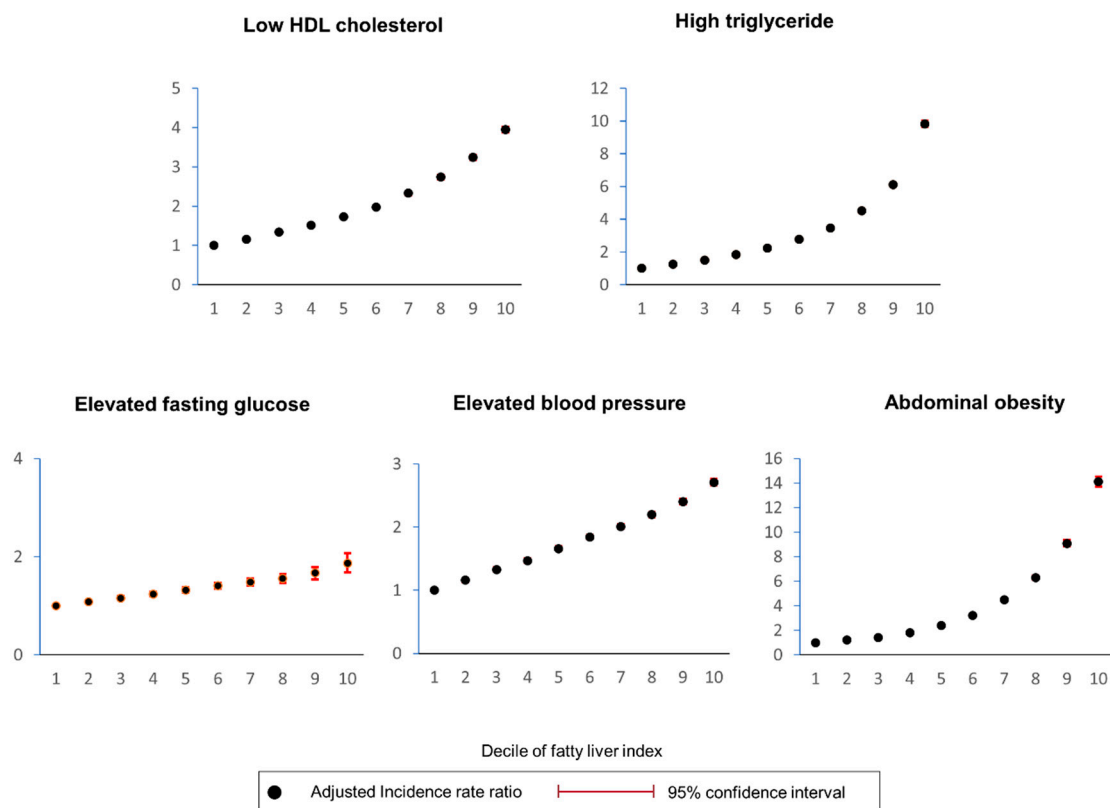

**Supplementary Figure S1. Fatty liver index and risk of metabolic components by decile groups**
